# Supplementary material for: Elusive sources of variability of dystrophin rescue by exon skipping
Source: PubMed Central journal article supplement (PMC4667482; doi:10.1186/s13395-015-0070-6), 2015-12-01
Supplement: 13395_2015_70_MOESM2_ESM.pdf [file 13395_2015_70_MOESM2_ESM.pdf]

|       | Immunofluorescence |      |              |       |              |      |               |      |               |      |              |      |
|-------|--------------------|------|--------------|-------|--------------|------|---------------|------|---------------|------|--------------|------|
|       | Triceps            |      | Quadriceps   |       | Diaphragm    |      | Gastroc       |      | TA            |      | Heart        |      |
| ID    | Mean ± SD          | CV%  | Mean ± SD    | CV%   | Mean ± SD    | CV%  | Mean ± SD     | CV%  | Mean ± SD     | CV%  | Mean ± SD    | CV%  |
| mdx-1 | 78.34 ± 2.98       | 3.8  | 29.47 ± 2.68 | 12.5  | 15.34 ± 1.00 | 6.6  | 6.72 ± 4.15   | 61.8 | 12.66 ± 0.91  | 7.2  | 0.39 ± 0.02  | 4.0  |
| mdx-2 | 33.65 ± 10.94      | 32.5 | 5.38 ± 2.19  | 40.8  | 4.52 ± 0.92  | 20.3 | 23.60 ± 13.57 | 57.5 | 6.70 ± 2.15   | 47.1 | 0.04 ± 0.002 | 5.2  |
| mdx-3 | 26.88 ± 4.61       | 17.1 | 3.56 ± 1.85  | 52.0  | 8.50 ± 2.91  | 34.2 | 2.79 ± 0.25   | 8.8  | 39.54 ± 12.70 | 32.1 | 0.02 ± 0.003 | 12.9 |
| mdx-4 | 8.92 ± 2.32        | 26.0 | 3.36 ± 1.34  | 39.8  | 14.92 ± 4.90 | 32.9 | 19.77 ± 4.00  | 20.2 | 6.82 ± 4.55   | 66.8 | 0.57 ± 0.06  | 11.1 |
| mdx-5 | 22.49 ± 12.11      | 53.8 | 10.72 ± 0.28 | 2.6   | 5.27 ± 2.08  | 39.4 | 12.07 ± 0.37  | 3.1  | 3.42 ± 2.42   | 70.7 | 0.16 ± 0.01  | 7.0  |
| mdx-6 | 61.06 ± 2.66       | 4.4  | 5.33 ± 1.23  | 23.1  | 5.83 ± 1.85  | 31.8 | 1.28 ± 0.25   | 19.2 | 6.68 ± 0.12   | 1.8  | 0.17 ± 0.07  | 38.9 |
| Avg   |                    | 22.9 |              | 28.5  |              | 27.5 |               | 28.4 |               | 37.6 |              | 13.2 |
|       | Western Blot       |      |              |       |              |      |               |      |               |      |              |      |
|       | Triceps            |      | Quadriceps   |       | Diaphragm    |      | Gastroc       |      | TA            |      | Heart        |      |
| ID    | Mean ± SD          | CV%  | Mean ± SD    | CV%   | Mean ± SD    | CV%  | Mean ± SD     | CV%  | Mean ± SD     | CV%  | Mean ± SD    | CV%  |
| mdx-1 | 71.06 ± 18.34      | 25.8 | 9.55 ± 4.56  | 47.8  | 21.39 ± 2.97 | 13.9 | 10.09 ± 1.02  | 10.1 | 1.59 ± 0.59   | 37.0 | 0.78 ± 0.29  | 40.3 |
| mdx-2 | 15.80 ± 5.82       | 36.9 | 6.21 ± 6.36  | 102.4 | 7.59 ± 1.57  | 20.7 | 25.27 ± 2.57  | 10.2 | 1.36 ± 0.51   | 37.7 | 0.56 ± 0.14  | 25.3 |
| mdx-3 | 32.78 ± 2.23       | 6.8  | 7.34 ± 6.96  | 94.8  | 0.96 ± 0.17  | 0.18 | 4.54 ± 0.26   | 5.6  | 26.71 ± 11.42 | 42.8 | 0.59 ± 0.18  | 29.9 |
| mdx-4 | 11.73 ± 10.36      | 65.9 | 1.81 ± 1.41  | 78.1  | 15.82 ± 1.81 | 11.5 | 4.16 ± 0.87   | 20.8 | 7.57 ± 0.88   | 11.6 | 0.76 ± 0.39  | 51.6 |
| mdx-5 | 11.48 ± 5.87       | 51.1 | 8.81 ± 8.81  | 100.0 | 25.56 ± 3.54 | 13.3 | 2.73 ± 0.82   | 30.0 | 1.10 ± 0.39   | 35.5 | 0.76 ± 0.36  | 47.0 |
| mdx-6 | 23.96 ± 9.35       | 39.0 | 1.33 ± 0.61  | 46.0  | 13.03 ± 0.65 | 5.0  | 2.30 ± 0.15   | 6.5  | 7.19 ± 0.30   | 4.1  | 0.75 ± 0.34  | 44.8 |
| Avg   |                    | 37.6 |              | 78.2  |              | 13.8 |               | 13.9 |               | 28.1 |              | 39.8 |

**Additional File 2: Intra-sample variability – Dystrophin protein (% relative to WT).** The table provides individual values for dystrophin quantification by IF and IB. Expression levels of *de novo* dystrophin varied highly between animals and between muscles, regardless of the detection method used.
