# Supplementary material for: Elusive sources of variability of dystrophin rescue by exon skipping
Source: PubMed Central journal article supplement (PMC4667482; doi:10.1186/s13395-015-0070-6), 2015-12-01
Supplement: 13395_2015_70_MOESM4_ESM.pdf [file 13395_2015_70_MOESM4_ESM.pdf]

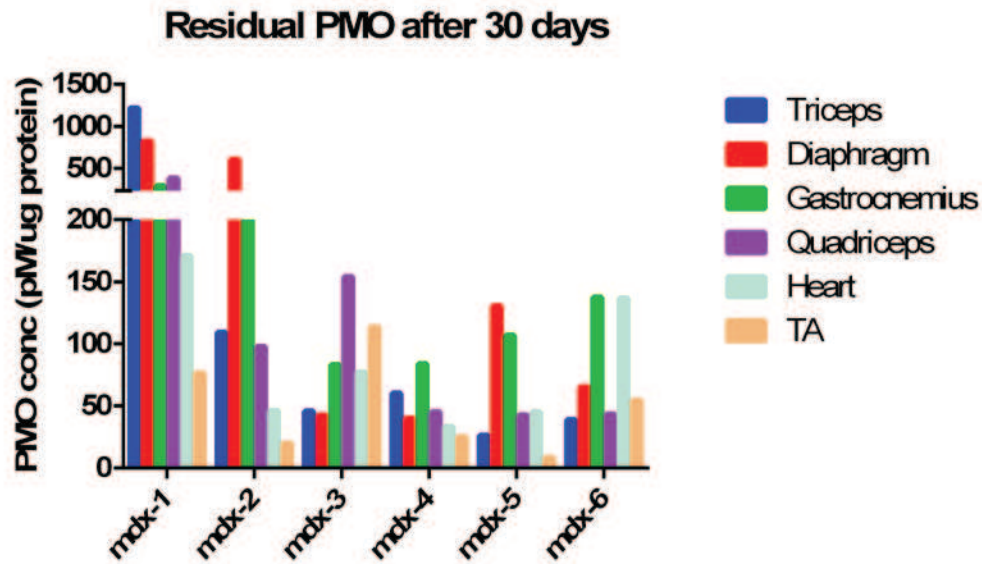

**Additional File 4: Residual PMO concentration by mouse and muscle group.** Residual morpholino concentration was measured in diaphragm, heart, gastrocnemius, quadriceps, tibialis anterior and triceps muscle extracts at 30 days after PMO administration (n=6). We observed variable retention levels of PMO between muscle groups and animals after 30 days of delivery.
