# Supplementary material for: Elusive sources of variability of dystrophin rescue by exon skipping
Source: PubMed Central journal article supplement (PMC4667482; doi:10.1186/s13395-015-0070-6), 2015-12-01
Supplement: 13395_2015_70_MOESM6_ESM.pdf [file 13395_2015_70_MOESM6_ESM.pdf]

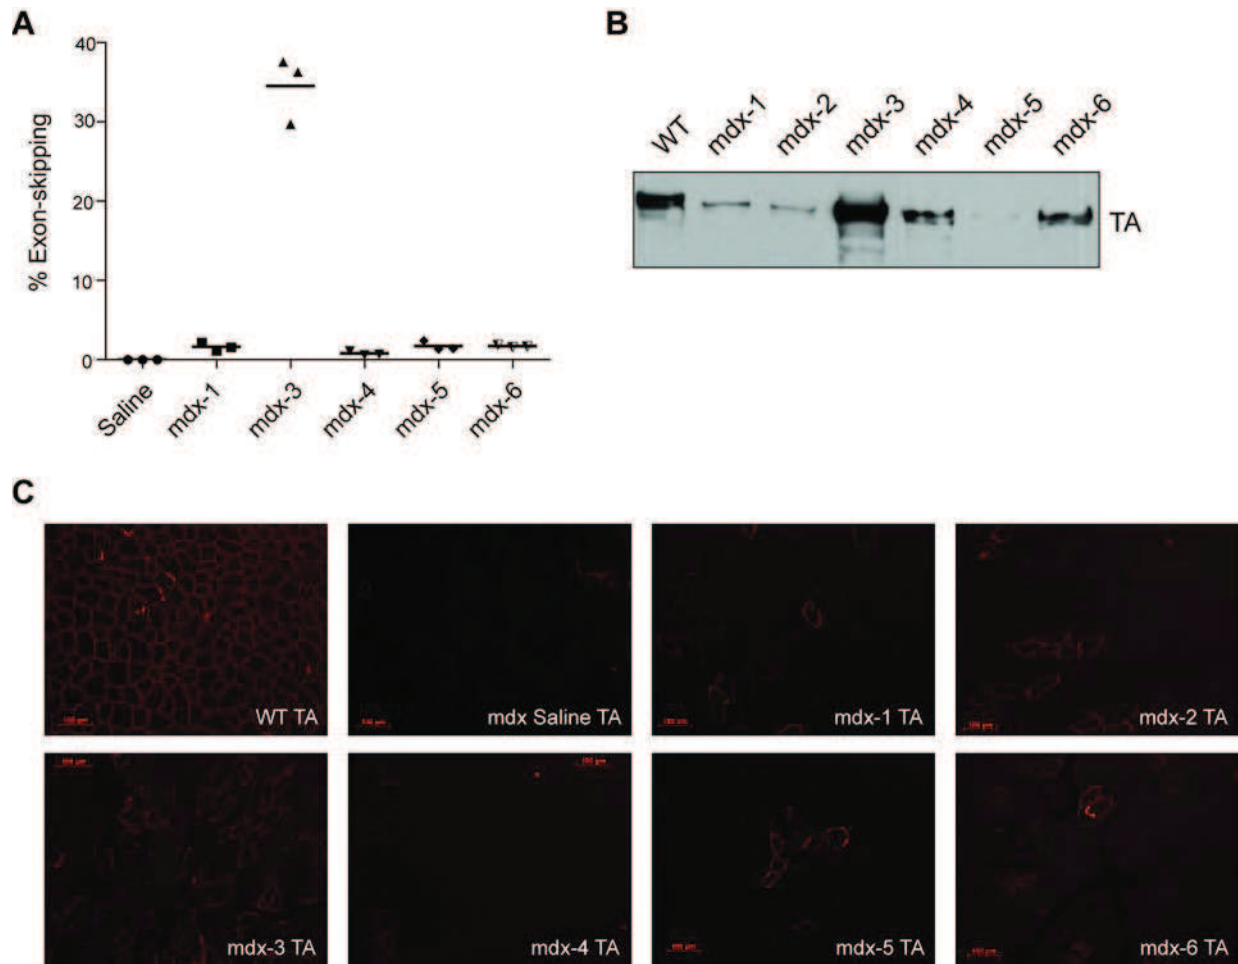

**Additional File 6: Correlation between dystrophin transcript levels by real time qPCR and dystrophin protein amounts in TA muscle.** We compared dystrophin protein levels by IF and WB with mRNA transcript levels at 30 days after one high dose PMO injection (800mg/kg). A) By RTqPCR, mdx-3 mouse shows the highest percent exon-skipping which translates to high dystrophin protein amounts as observed by B) WB and C) IF.
